# Supplementary material
Source: Elsevier journal article supplement (https://www.sciencedirect.com/science/article/pii/S030089321830472X)

## SUPPLEMENTARY MATERIAL

**Table 1**

Prevalence Ratios for Clustered Cardiovascular Risk Factors (Hypertension, Diabetes, Obesity, Dyslipidemia, and Tobacco Smoking) According to Tertiles of Adherence to the Energy-restricted Mediterranean Diet Score

| Number of risk factors             | Adherence to the energy-restricted Mediterranean diet |                  |                  | <i>P</i> for trend |
|------------------------------------|-------------------------------------------------------|------------------|------------------|--------------------|
|                                    | Low ( $\leq 7$ )                                      | Medium (8-10)    | High (11-17)     |                    |
|                                    | n = 2494                                              | n = 2789         | n = 1591         |                    |
| <i>2 or more risk factors, %</i>   | 96.4                                                  | 95.7             | 95.1             |                    |
| Age and sex-adjusted               | 1 (ref.)                                              | 0.98 (0.93-1.02) | 0.96 (0.90-1.00) | .705               |
| Multivariate adjusted <sup>a</sup> | 1 (ref.)                                              | 0.97 (0.92-1.02) | 0.96 (0.90-1.01) | .734               |
|                                    |                                                       |                  |                  |                    |
| <i>3 or more risk factors, %</i>   | 72.4                                                  | 70.1             | 67.8             |                    |
| Age and sex-adjusted               | 1 (ref.)                                              | 0.99 (0.97-1.00) | 0.97 (0.95-0.99) | .114               |
| Multivariate adjusted <sup>a</sup> | 1 (ref.)                                              | 0.99 (0.97-1.01) | 0.98 (0.96-1.00) | .369               |

|                                    |          |                  |                  |      |
|------------------------------------|----------|------------------|------------------|------|
|                                    |          |                  |                  |      |
| <i>4 or more risk factors, %</i>   | 24.7     | 23.1             | 21.6             |      |
| Age and sex-adjusted               | 1 (ref.) | 0.99 (0.97-1.01) | 0.98 (0.96-1.01) | .214 |
| Multivariate adjusted <sup>a</sup> | 1 (ref.) | 1.00 (0.98-1.02) | 0.99 (0.97-1.02) | .688 |
|                                    |          |                  |                  |      |
| <i>5 risk factors, %</i>           | 2.4      | 2.2              | 1.5              |      |
| Age and sex-adjusted               | 1 (ref.) | 1.01 (0.96-1.05) | 0.96 (0.87-1.03) | .454 |
| Multivariate adjusted <sup>a</sup> | 1 (ref.) | 1.02 (0.97-1.06) | 0.97 (0.88-1.04) | .681 |

<sup>a</sup>Adjusted for sex, age (continuous), family history of cardiovascular disease (yes/no), energy intake (continuous), physical activity (continuous), educational level (primary, secondary and university), married (yes/no), living alone (yes/no), previous weight loss dieting (yes/no), and node (recoded by number of participants).

Table 2

Prevalence Ratios for Clustered Cardiovascular Risk Factors (Hypertension, Obesity, and Dyslipidemia) According to Tertiles of Adherence to the Energy-restricted Mediterranean Diet Score.

| Number of risk factors             | Adherence to the energy-restricted Mediterranean diet |                  |                  | <i>P</i> for trend |
|------------------------------------|-------------------------------------------------------|------------------|------------------|--------------------|
|                                    | Low (≤ 7)                                             | Medium (8-10)    | High (11-17)     |                    |
|                                    | n = 2494                                              | n = 2789         | n = 1591         |                    |
| <i>2 or more risk factors, %</i>   | 94.7                                                  | 93.0             | 92.6             |                    |
| Age and sex-adjusted               | 1 (ref.)                                              | 0.98 (0.96-1.00) | 0.98 (0.95-0.99) | .431               |
| Multivariate adjusted <sup>a</sup> | 1 (ref.)                                              | 0.98 (0.96-0.99) | 0.98 (0.95-0.99) | .472               |
|                                    |                                                       |                  |                  |                    |
| <i>3 risk factors, %</i>           | 59.5                                                  | 56.3             | 54.5             |                    |
| Age and sex-adjusted               | 1 (ref.)                                              | 0.94 (0.89-0.98) | 0.90 (0.85-0.96) | .015               |
| Multivariate adjusted <sup>a</sup> | 1 (ref.)                                              | 0.94 (0.89-0.99) | 0.92 (0.87-0.98) | .076               |

<sup>a</sup>Adjusted for sex, age (continuous), smoking (never smoked, current, former), family history of cardiovascular disease (yes/no), energy intake (continuous), physical activity (continuous), educational level (primary, secondary and university), married (yes/no), living alone (yes/no), previous weight loss dieting (yes/no), diabetes status, and node (recoded by number of participants).

**Table 3**

Prevalence Ratios for Clustered Cardiovascular Risk Factors (Hypertension, Obesity, Dyslipidemia, and Tobacco Smoking) According to Tertiles of Adherence to the Energy-restricted Mediterranean Diet Score

| Number of risk factors             | Adherence to the energy-restricted Mediterranean diet |                  |                  | <i>P</i> for trend |
|------------------------------------|-------------------------------------------------------|------------------|------------------|--------------------|
|                                    | Low ( $\leq 7$ )                                      | Medium (8-10)    | High (11-17)     |                    |
|                                    | n = 2494                                              | n = 2789         | n = 1591         |                    |
| <i>2 or more risk factors, %</i>   | 95.7                                                  | 94.0             | 93.5             |                    |
| Age and sex-adjusted               | 1 (ref.)                                              | 0.95 (0.90-0.99) | 0.93 (0.87-0.98) | .452               |
| Multivariate adjusted <sup>a</sup> | 1 (ref.)                                              | 0.94 (0.89-0.98) | 0.93 (0.87-0.98) | .500               |
|                                    |                                                       |                  |                  |                    |
| <i>3 or more risk factors, %</i>   | 65.3                                                  | 61.0             | 58.7             |                    |
| Age and sex-adjusted               | 1 (ref.)                                              | 0.97 (0.95-0.99) | 0.96 (0.94-0.98) | .007               |
| Multivariate adjusted <sup>a</sup> | 1 (ref.)                                              | 0.98 (0.96-0.99) | 0.97 (0.94-0.99) | .043               |

|                                    |          |                  |                  |        |
|------------------------------------|----------|------------------|------------------|--------|
| <i>4 risk factors, %</i>           | 8.8      | 5.5              | 4.7              |        |
| Age and sex-adjusted               | 1 (ref.) | 0.94 (0.90-0.97) | 0.92 (0.86-0.97) | < .001 |
| Multivariate adjusted <sup>a</sup> | 1 (ref.) | 0.94 (0.90-0.98) | 0.93 (0.87-0.98) | .001   |

<sup>a</sup>Adjusted for sex, age (continuous), family history of cardiovascular disease (yes/no), energy intake (continuous), physical activity (continuous), educational level (primary, secondary and university), married (yes/no), living alone (yes/no), previous weight loss dieting (yes/no), diabetes status, and node (recoded by number of participants).

Figure 1

Mean number of cardiovascular risk factors (hypertension, obesity, dyslipidemia, and diabetes) according to tertiles of adherence to the energy-restricted Mediterranean diet.

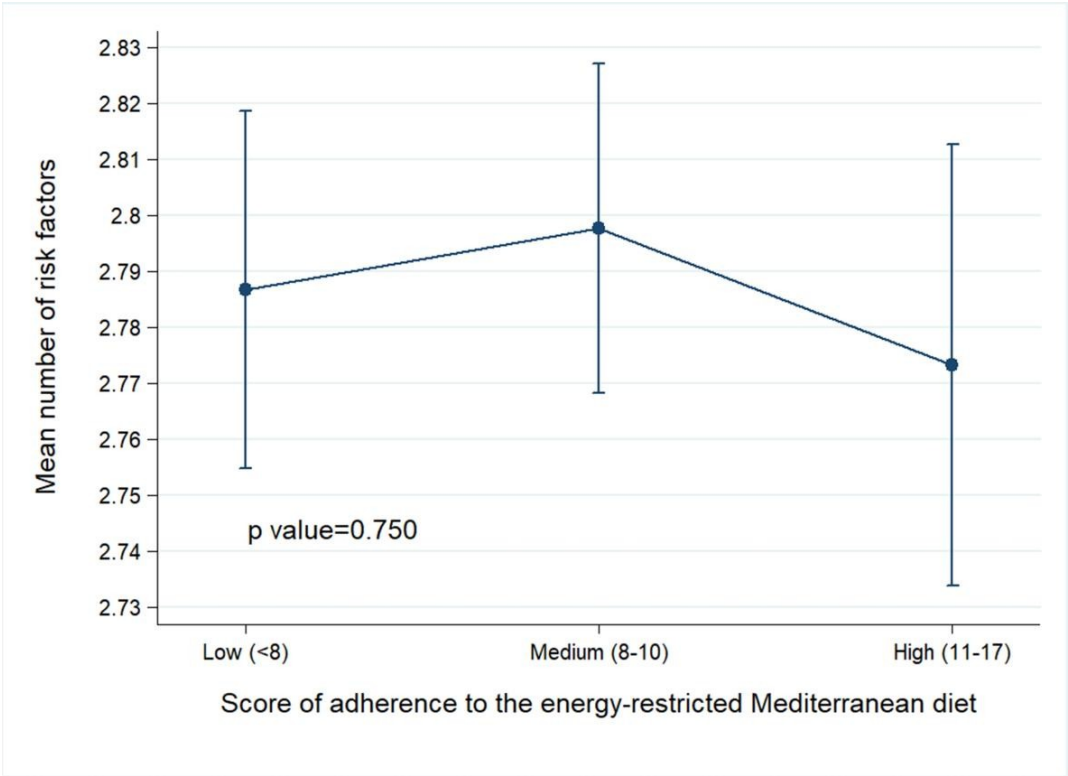

Figure 2

Prevalence ratio of a waist-to-height ratio higher than 0.7 across quartiles of adherence to the energy-restricted Mediterranean diet score.

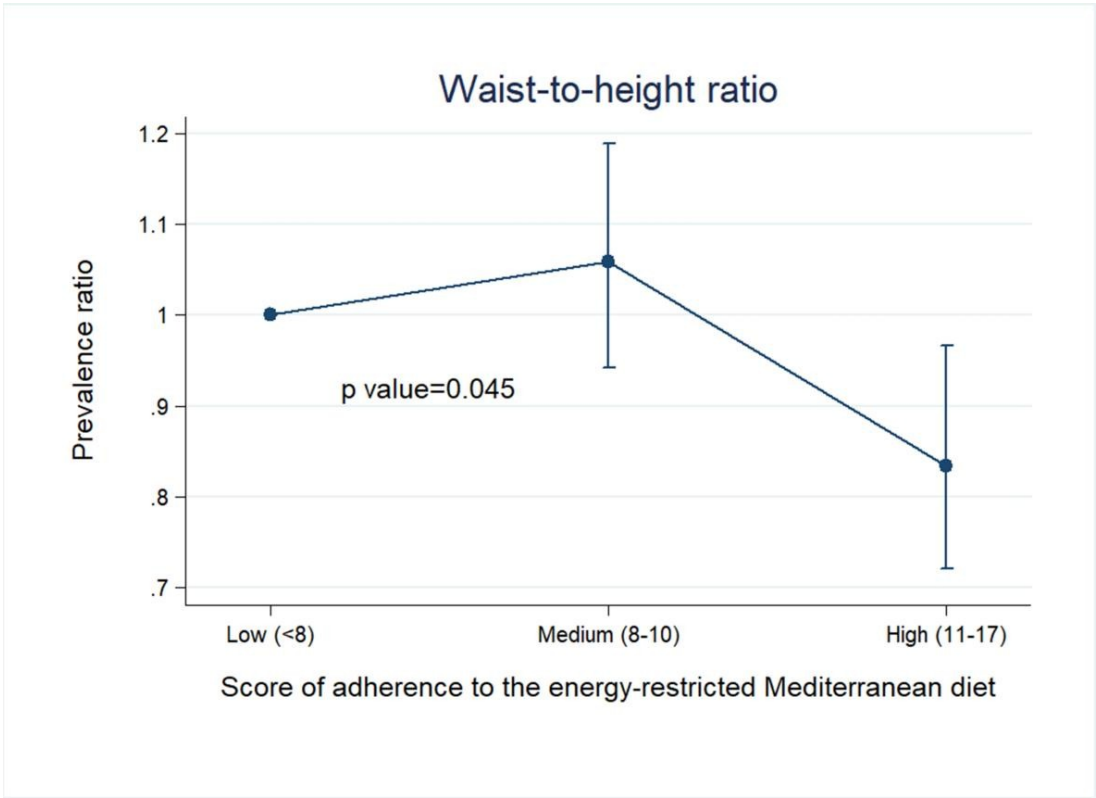



Figure 3

Mean number of cardiovascular risk factors (hypertension, obesity, dyslipidemia and diabetes) in men and women according to quartiles of adherence to the energy-restricted Mediterranean diet.

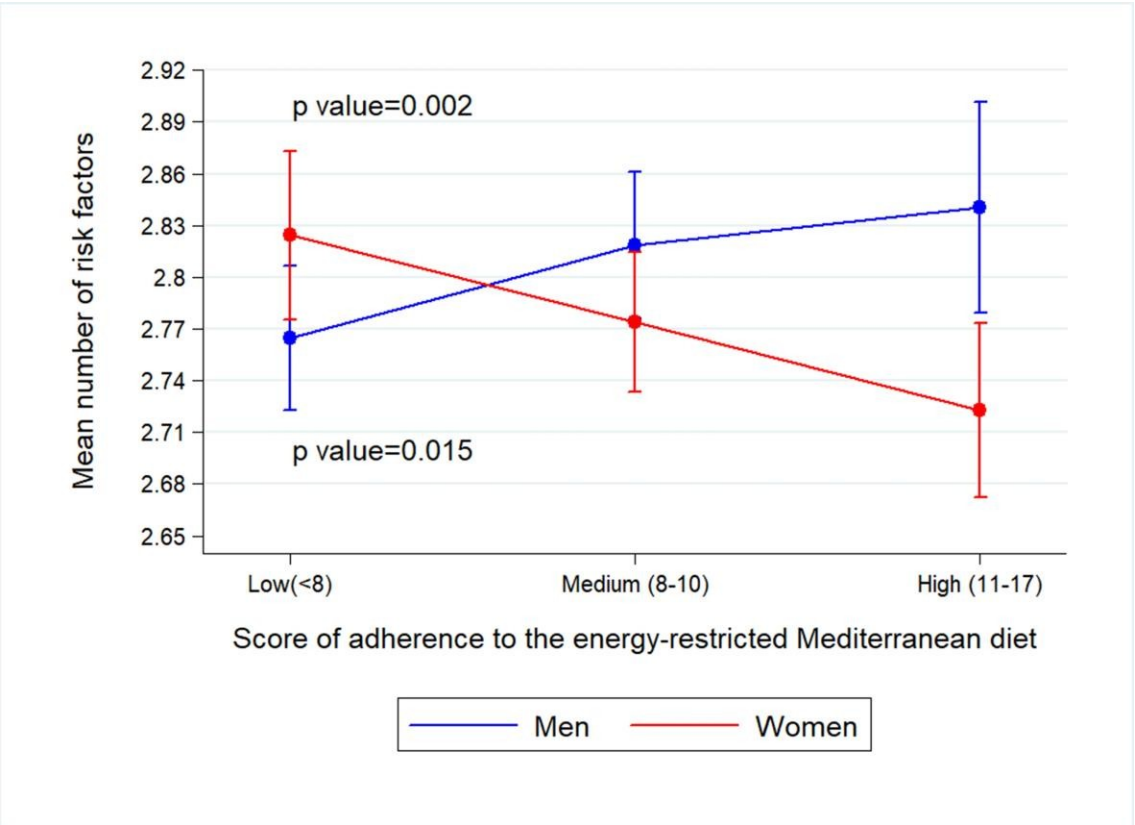

Supplement: mmc1 [file S030089321830472X:mmc1.pdf]
